# Supplementary material
Source: publisher figshare collection journal article supplement (https://gsapubs.figshare.com/articles/dataset/_/12528485)
Supplement: Supplementary file 1 [file 1]

Archive with 2 entries (2 files):
- 2012211.pdf
- 2012211_FigureDR2.kmz
