# Supplementary material
Source: publisher figshare collection journal article supplement (https://gsapubs.figshare.com/articles/dataset/_/12528485)

Figure DR1. The locations of the  $^{10}\text{Be}$  exposures ages (in Ka) and K-Ar ages (in Ma) in Table 2 relative to the general geological map of Chile (from SERNAGEOMIN, the national geological and mineral service of Chile). The Cenozoic basin fills are indicated on the legend.

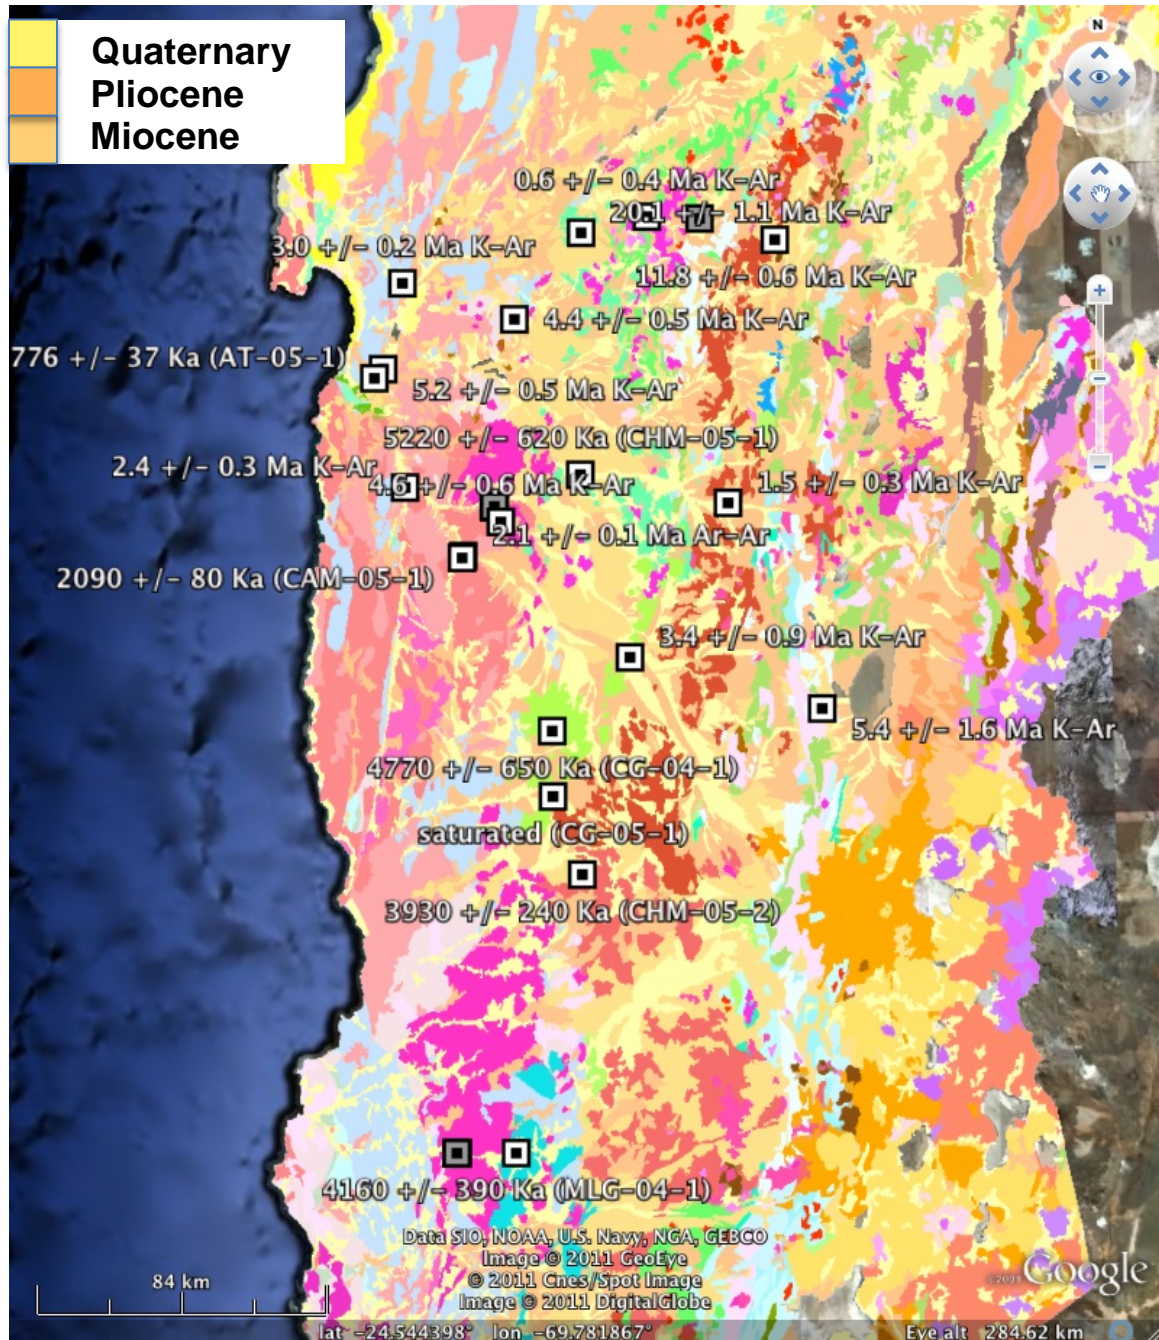

Supplement: Supplementary file 1 [file 1 › 2012211.pdf]
